# Supplementary material
Source: PubMed Central journal article supplement (PMC6898778)
Supplement: NIHMS1538993-supplement-2.pdf [file NIHMS1538993-supplement-2.pdf]

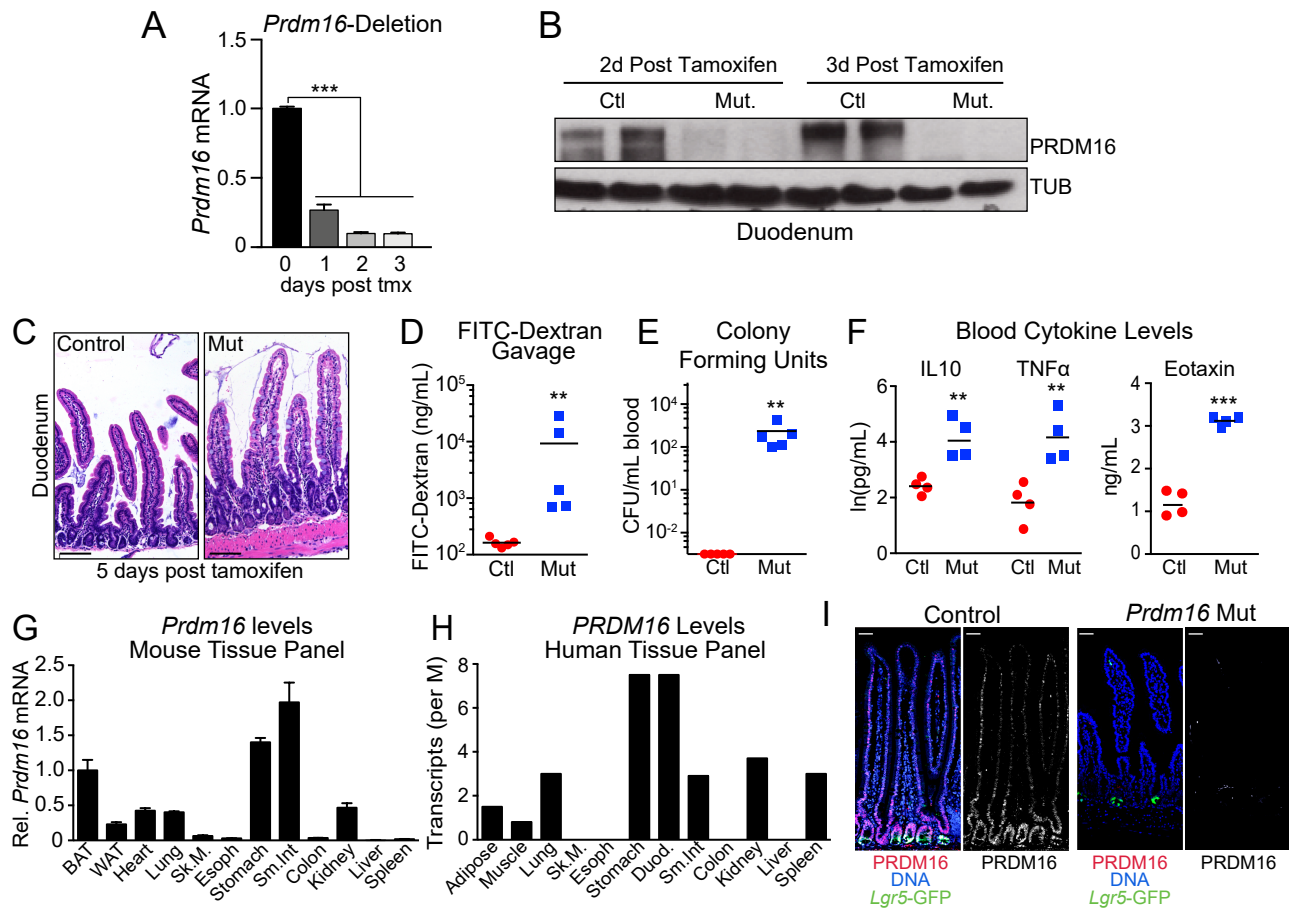

**Fig. S1: *Prdm16* is required for small intestine maintenance. (Related to Fig. 1).**

**A-F)** Phenotypes of *Prdm16*<sup>loxP/loxP</sup> (Control, Ctl) or *R26R*<sup>Cre-ERT2</sup>;*Prdm16*<sup>loxP/loxP</sup> (Mut) animals after injection with tamoxifen. **A)** Relative *Prdm16* mRNA levels in duodenal crypts at 0, 1, 2, and 3 d post- injection. n=4 mice per group. **B)** Western blot analysis of PRDM16 protein levels in duodenal crypts. n=2 mice/group. **C)** H&E staining of duodenum 5d after tmx injection. **D)** FITC levels in circulation following FITC-Dextran gavage of mice at 6d after tmx injection. n=5 mice per group. **E)** Number of colony forming units (CFU) from whole blood collected 6d after injection. n=5 mice per group. **F)** Cytokine levels measured by Luminex analysis of serum taken 5d after injection. n=4 mice per group. **G)** Relative *Prdm16* mRNA levels across a panel of mouse tissues. n=3 mice. Sk. M= skeletal muscle, Esoph= esophagus, Sm. Int.= small intestine, WAT= white adipose tissue. **H)** *PRDM16* expression in human tissues (from the Human Protein Atlas (<https://www.proteinatlas.org>)). **I)** α-PRDM16 antibody staining validated by probing *Prdm16* knockout duodenum sections. Compare to Fig. 1E: control is the same image in Fig. 1E. PRDM16 (red), *Lgr5*-GFP (green), DNA (DAPI, blue). PRDM16 only channel in white. All panels show mean ± SEM, \*p<0.05, \*\*p<0.01, \*\*\*p<0.001. Scale bars: 100 μm (C, I).





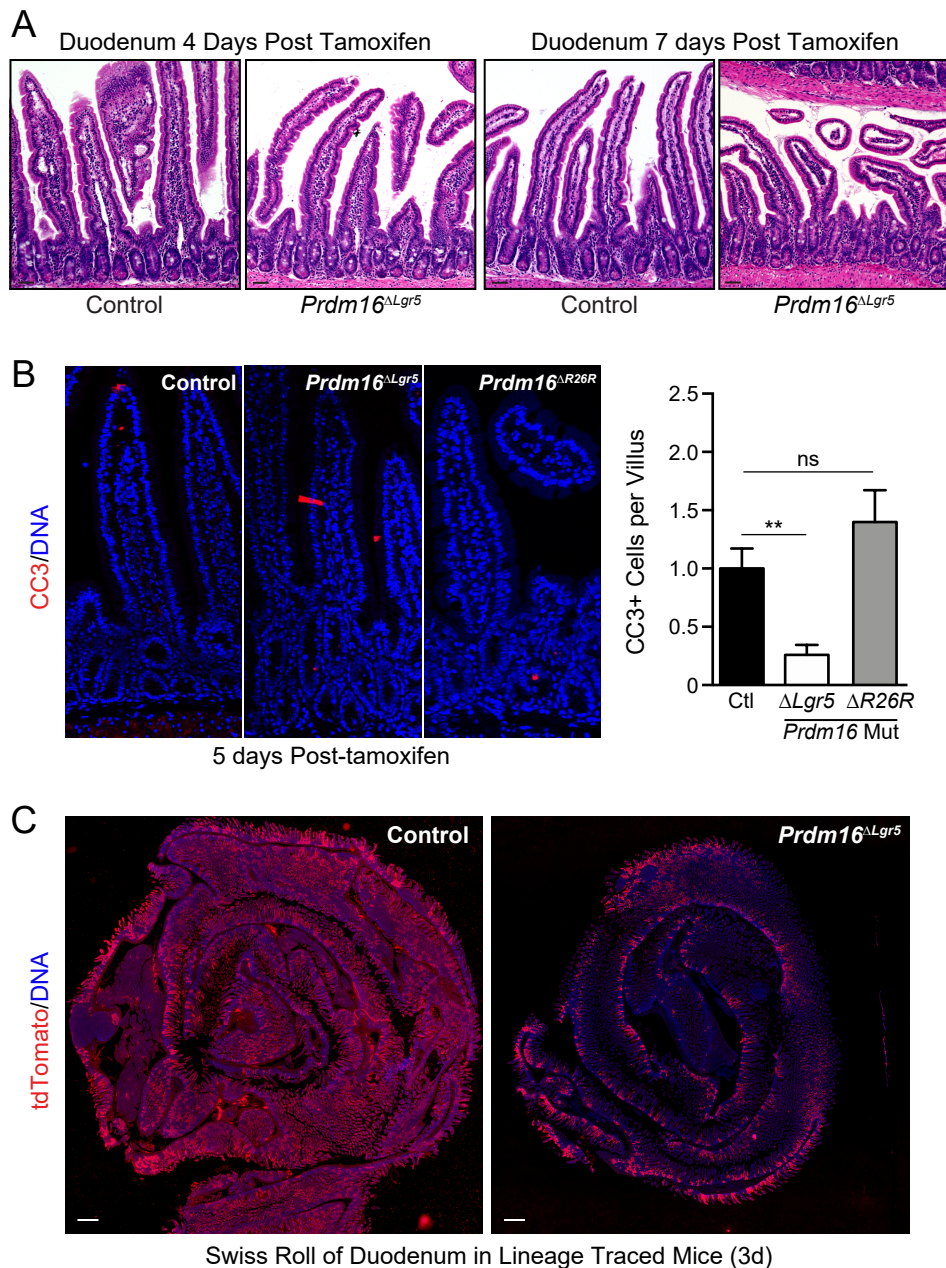

**Fig. S3: *Prdm16* deletion causes apoptosis in transit-amplifying cells. (Related to Fig.3).**

**A)** H&E staining of duodenum from *Prdm16<sup>ΔLgr5</sup>* (*Lgr5<sup>GFP/Cre-ERT2</sup>;Prdm16<sup>loxP/loxP</sup>*) mice 4d and 7d after injection with tamoxifen (tmx) (*Prdm16<sup>ΔLgr5</sup>*) or vehicle (corn oil; Control). **B)** (left) Immunofluorescence staining of Cleaved Caspase 3 (CC3; red) in duodenum from Control (corn oil-treated *Lgr5<sup>GFP/Cre-ERT2</sup>;Prdm16<sup>loxP/loxP</sup>*), *Prdm16<sup>ΔLgr5</sup>* (tmx-treated *Lgr5<sup>GFP/Cre-ERT2</sup>;Prdm16<sup>loxP/loxP</sup>*) or *Prdm16<sup>ΔR26R</sup>* (tmx-treated *R26R<sup>CreERT2</sup>;Lgr5<sup>GFP/CreERT2</sup>;Prdm16<sup>loxP/loxP</sup>*) mice 5d after injection. DNA (DAPI, blue). (right) Quantification of CC3+ cells in villi. n=27-53 villi from 3 mice per group. **C)** Immunofluorescence analysis of tdTomato expression (lineage-tracing) in duodenal "Swiss rolls" from Control (*Lgr5<sup>GFP/Cre-ERT2</sup>;R26R<sup>lox-stop-lox-tdTomato</sup>;Prdm16<sup>loxP/+</sup>*) or mutant (*Prdm16<sup>ΔLgr5</sup>;Lgr5<sup>GFP/Cre-ERT2</sup>;R26R<sup>lox-stop-lox-tdTomato</sup>;Prdm16<sup>loxP/loxP</sup>*) animals at 3d post-tamoxifen injection. tdTomato (red), DNA (DAPI, blue). Scale bars: 50  $\mu$ m (A,B), 1 mm.

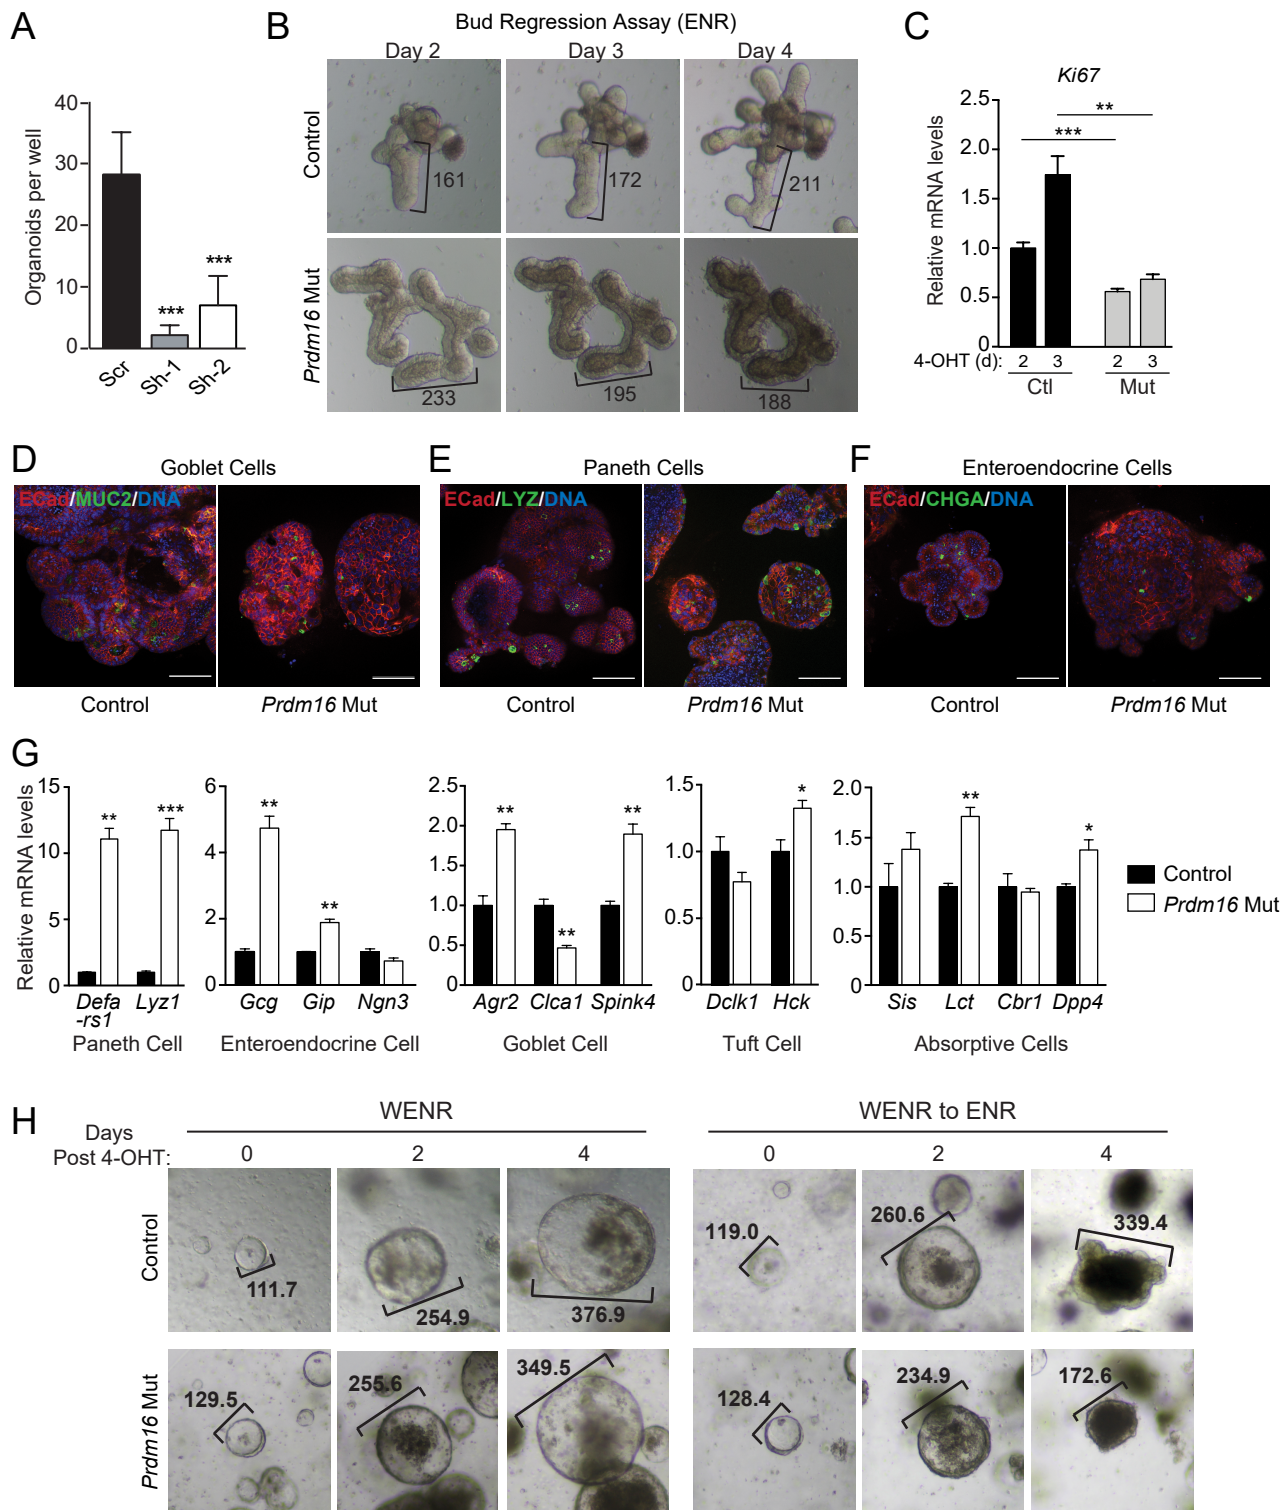

**Fig.S4: *Prdm16* is required for normal budding of duodenal enteroids. (Related to Fig. 4).**

**A**) Enteroid formation after transduction with lentivirus encoding control (scramble; scr) or *Prdm16* (*Sh-1*, *Sh-2*) shRNAs. n=3 wells per group. **B**) Example of bud regression assay (see Methods) where enteroids were allowed to bud before 4-OHT addition, and then individual enteroid bud size was measured over time. Length is in  $\mu\text{m}$ . **C**) Relative *Ki67* mRNA levels in control and *Prdm16* mutant enteroids at 2d and 3d following *ex vivo* 4-OHT treatment. n=4 wells. **D-F**) Immunofluorescence analysis of cell type-selective markers in Control (*Lgr5<sup>GFP/CreERT2</sup>; Prdm16<sup>loxP/loxP</sup>*) and *Prdm16* mutant (*R26R<sup>CreERT2</sup>; Lgr5<sup>GFP/CreERT2</sup>; Prdm16<sup>loxP/loxP</sup>*) enteroids at 4d after treatment with 4-OHT (Mut) or vehicle (ethanol, control). E- Cadherin (red), DNA (DAPI, blue). **D**) Mucin2 (MUC2, green); **E**) Lysozyme (LYZ, green); **F**) Chromogranin A (CHGA, green). **G**) Relative mRNA levels of cell type-selective markers (as indicated) in enteroids from control and *Prdm16* mutant mice 4 days after 4OHT treatment in culture. n= 4 wells. **H**) Examples of growth measurements (see Methods) of control and mutant enteroids. Bars show size of enteroids in microns. All panels show Mean  $\pm$  SEM. \*p-value<0.05, \*\*p-value<0.01, \*\*\*p-value<0.001, Scale bars: 100  $\mu\text{m}$  (D-F).



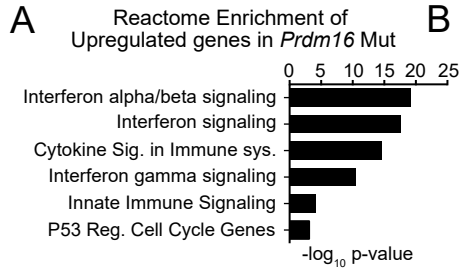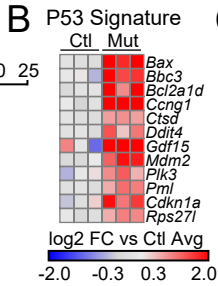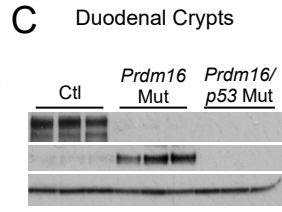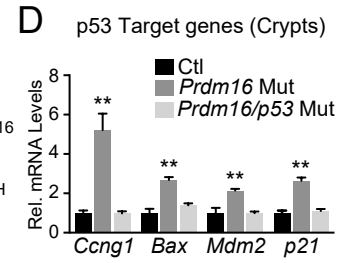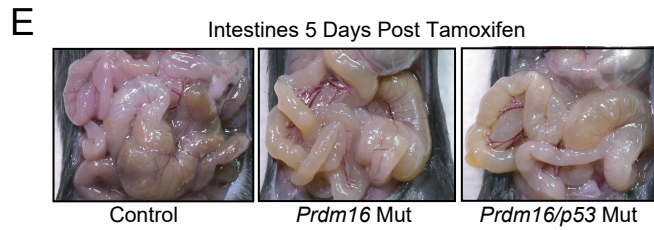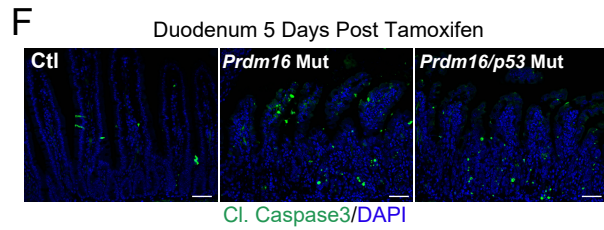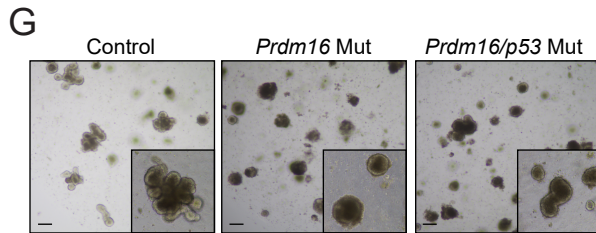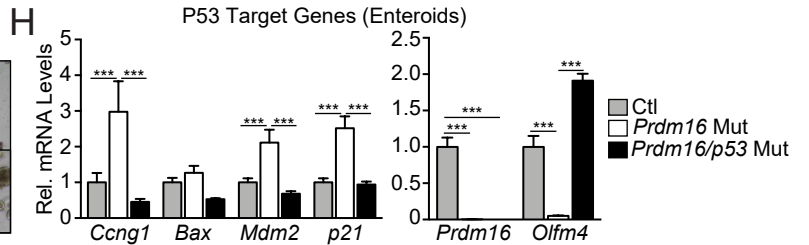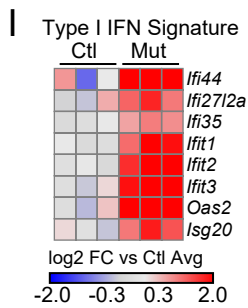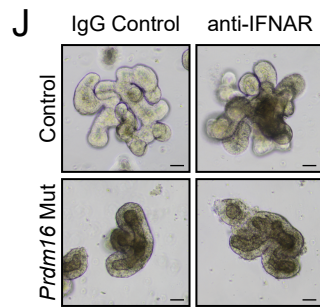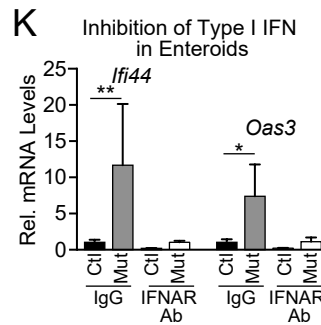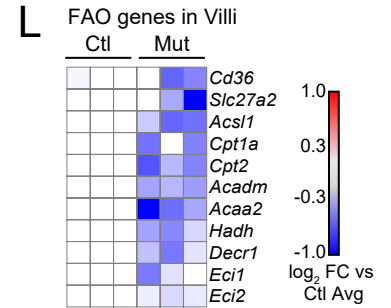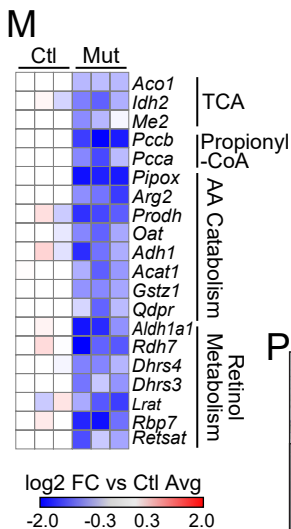

**N**

| Gene           | PRDM16 TSS Peak +/- 3 kb | Closest PRDM16 Peak | PPAR Binding TSS +/- 3kb | Down at day 3 | Down further at day 5 |
|----------------|--------------------------|---------------------|--------------------------|---------------|-----------------------|
| <i>Cd36</i>    | No                       | +20 kb              | No                       | Yes           | No                    |
| <i>Slc27a2</i> | Yes                      | -0.2 kb             | Yes                      | Yes           | Yes                   |
| <i>Acs1</i>    | Yes                      | +0.0 kb             | No                       | Yes           | Yes                   |
| <i>Cpt1a</i>   | No                       | +11 kb              | No                       | Yes           | Yes                   |
| <i>Cpt2</i>    | Yes                      | +2.1 kb             | Yes                      | Yes           | Yes                   |
| <i>Acadm</i>   | Yes                      | -0.1 kb             | No                       | Yes           | Yes                   |
| <i>Acaa2</i>   | Yes                      | -0.1 kb             | Yes                      | Yes           | Yes                   |
| <i>Hadh</i>    | Yes                      | +0.6 kb             | Yes                      | Yes           | Yes                   |
| <i>Decr1</i>   | Yes                      | +1.0 kb             | Yes                      | Yes           | Yes                   |
| <i>Eci1</i>    | No                       | +12 kb              | No                       | Yes           | No                    |
| <i>Eci2</i>    | Yes                      | +0.0 kb             | Yes                      | Yes           | Yes                   |

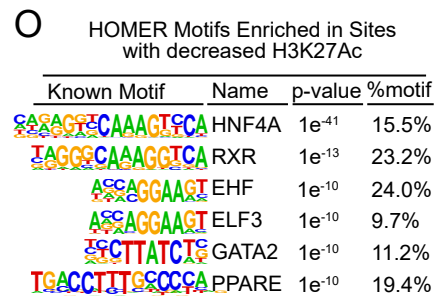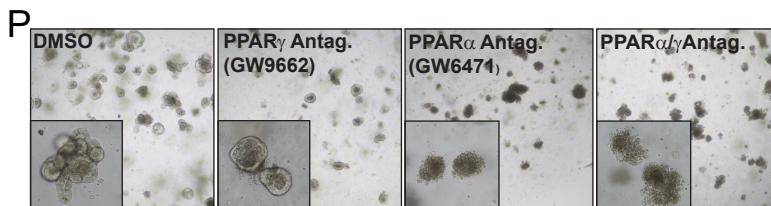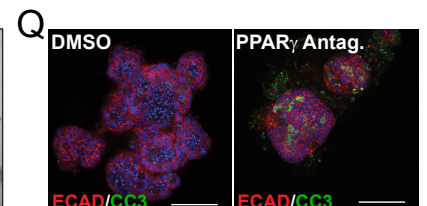

**Fig. S5: The *Prdm16* mutant intestinal phenotype does not depend on upregulated P53 and Type I Interferon signaling. (Related to Fig. 5).**

- A)** Pathway enrichment analysis of genes upregulated (FDR<0.05) in mutant duodenal crypts at 3d post-tamoxifen (tmx) injection. *R26R<sup>CreERT2</sup>; Prdm16<sup>loxP/loxP</sup>* (Mut.) or *Prdm16<sup>loxP/loxP</sup>* (control).
- B)** Expression heat map of P53 target gene levels in control and *Prdm16* mutant crypts at 3d after deletion. Log<sub>2</sub> fold change shown relative to mean control expression.
- C)** Western blot analysis of PRDM16 and P53 protein levels in isolated crypts from control, *Prdm16* mutant, and *Prdm16/p53* double mutant (*R26R<sup>CreERT2</sup>; Prdm16<sup>loxP/loxP</sup>, p53<sup>loxP/loxP</sup>*) mice at 3d post-tmx injection. Loading control is GAPDH. n=3 mice.
- D)** Relative mRNA levels of P53 target genes in crypts from control, *Prdm16* mutant, and *Prdm16/p53* mutant mice. n=3 mice.
- E)** Gross appearance of intestines from control, *Prdm16* mutant, and *Prdm16/p53* mice at 5d post-tmx.
- F)** Immunofluorescence analysis of Cleaved Caspase 3 in duodenum from control, *Prdm16* mutant, and *Prdm16/P53* mutant mice. Cl. Caspase 3 (green), DNA (DAPI, blue).
- G)** Images of control, *Prdm16* mutant, and *Prdm16/P53* mutant enteroids after 4-OHT treatment, with magnified detail shown in inset.
- H)** Relative mRNA levels of P53 target genes, *Prdm16*, and *Olfm4* in control, *Prdm16* mutant, and *Prdm16/P53* mutant enteroids, 5d after *ex vivo* treatment with 4-OHT. n=3 wells.
- I)** Expression heat map of Type I interferon signaling genes in control and *Prdm16* mutant crypts at 3d post-tmx. Log<sub>2</sub> fold change shown relative to mean control expression.
- J-K)** Control and *Prdm16* mutant enteroids treated with either IgG (control) or IFNAR neutralizing antibody. (J) Morphology and (K) Relative mRNA levels of Type I interferon-signature genes. n=3-4 wells.
- L)** Expression heat map of fatty acid oxidation (FAO)-related genes in control and *Prdm16* mutant villi 3d post-tmx. Fractionated villi were from the same mice used for crypt analysis in Fig. 5B.
- M)** Expression heat map of metabolic pathway genes in control and *Prdm16* mutant crypts at 3d post-tmx.
- N)** Table summarizing PRDM16 regulation of FAO genes. PRDM16 ChIP-seq peak location, both within 3 kb in either direction of transcriptional start site (TSS) and nearest location; presence of a PPAR ChIP-qPCR site, and associated mRNA expression analysis at d3 and d5.
- O)** Enriched transcription factor binding motifs at sites of decreased H3K27Ac following *Prdm16* deletion.
- P)** Wildtype enteroids treated with vehicle (DMSO), PPAR<sub>γ</sub> antagonist (GW9662, 5 μm), PPAR<sub>α</sub> (GW6471, 5 μm), or both antagonists (5 μm for each treatment) for a period of 4 days.
- Q)** Enteroids treated with PPAR<sub>γ</sub> antagonist (GW9662, 5 μm) for 4 days and stained with Cl. Caspase 3 (green). E-Cad (Red), DNA (DAPI, blue).
- All panels show Mean ± SEM. \*p-value<0.05, \*\*p-value<0.01, \*\*\*p-value<0.001, Scale bars: 100 μm (F,G,P,Q), 50 μm (J).



### A $^{13}\text{C}_{16}$ -Palmitate treated Crypts

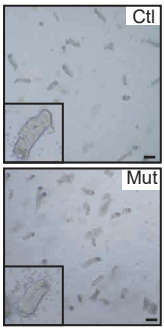

### Enteroids Formed From Labeled Crypts

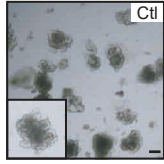

### B $^{13}\text{C}_{16}$ -Palmitate Metabolomics (First Run)

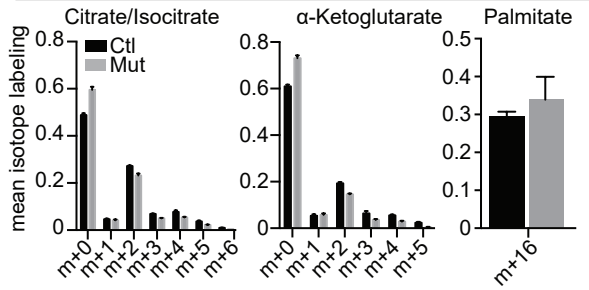

### $^{13}\text{C}_{16}$ -Palmitate Metabolomics (Second Run)

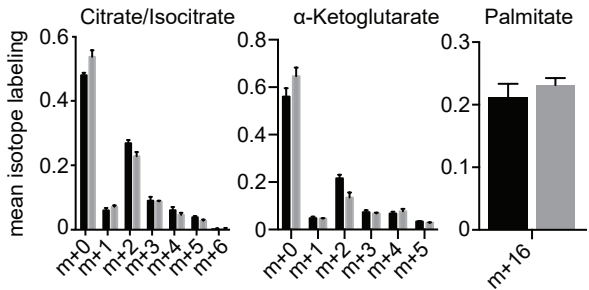

### C $^{13}\text{C}_6$ -Glucose Metabolomics

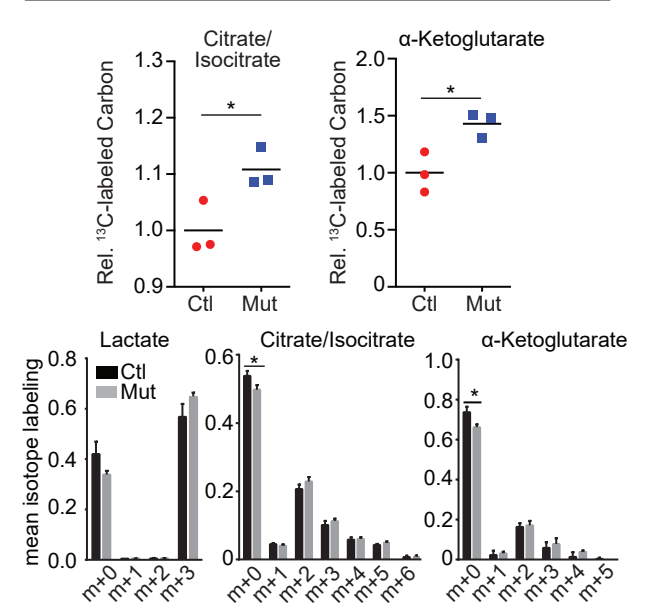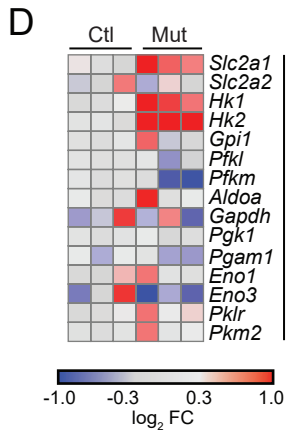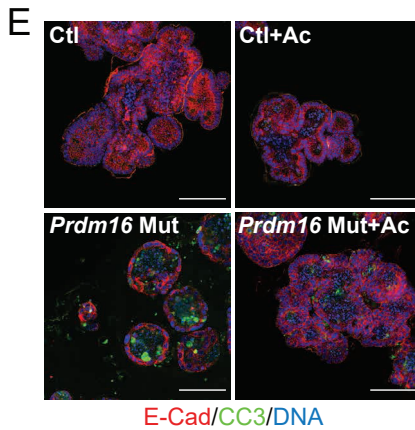

### F Secondary Enteroids (Quantification in Fig. 6)

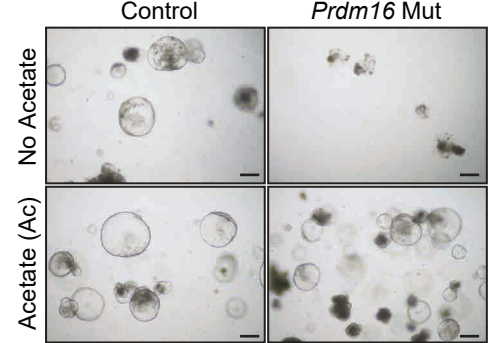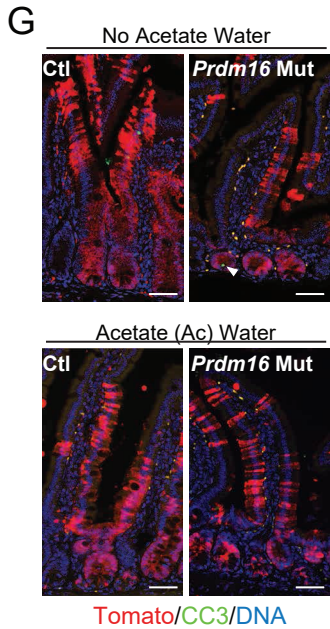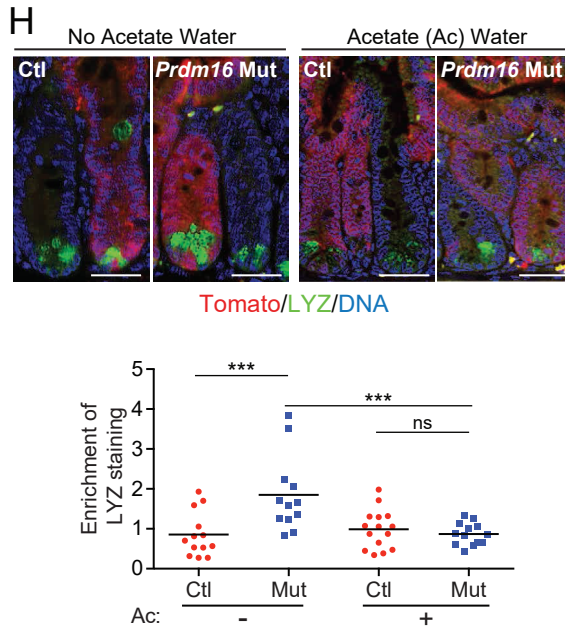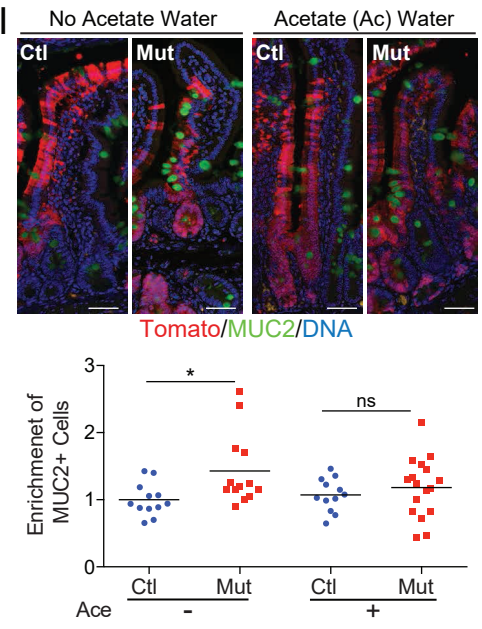

**Fig. S6: Decreased fatty acid oxidation (FAO) in PRDM16 mutant crypts is partially rescued by supplementation with acetate. (Related to Fig. 6).**

**A)** Crypts retain their structure and viability during palmitate metabolomics. (left) Brightfield images of isolated crypts during  $^{13}\text{C}_{16}$ -palmitate exposure. (right) Enteroids derived from control crypts 4d after exposure to  $^{13}\text{C}_{16}$ -palmitate.

**B)** Replicate experiments analyzing control and  $R26R^{\text{CreERT2}}; Prdm16^{\text{loxP/loxP}}$  duodenal crypts at 3d post-tamoxifen. Fractional isotope labeling of citrate/isocitrate,  $\alpha$ -ketoglutarate, and palmitate after incubation for 90 minutes in uniformly labeled  $^{13}\text{C}_{16}$ -palmitate. Data from the replicates were combined for final analysis. First run, n=2 for control, n=3 for Mut; Second run, n=2 for control, n=2 for Mut.

**C)** (Top) Relative  $^{13}\text{C}$  label in the citrate and  $\alpha$ -ketoglutarate metabolite pools in control vs mutant enteroids 2d after  $Prdm16$  deletion following incubation with  $^{13}\text{C}_6$ -glucose for 4 hours. n=3 mice per group.  $^{13}\text{C}$ -labeling =  $\sum$  (% of isotopomer multiplied by labeled carbons in isotopomer) divided by the number of carbons in molecule. (Bottom) Fractional  $^{13}\text{C}$  labeling of lactate, citrate, and  $\alpha$ -ketoglutarate in duodenal enteroids cultured in  $^{13}\text{C}_6$  glucose for 4 hours. Experiments were performed 2d after  $Prdm16$  deletion. Enteroids were from n=3 mice for each condition. n=3 mice.

**D)** Expression heat map of glycolysis genes in control and mutant crypts, 3d after inducing  $Prdm16$  deletion. Log<sub>2</sub> fold change shown relative to mean control expression. n=3 mice per group.

**E)** Staining of Cl. Caspase 3 in control or  $Prdm16$  mutant enteroids treated with sodium chloride (No Acetate, 5 mM) or sodium acetate (5 mM) 4 days after 4OHT treatment.

**F)** Secondary enteroids derived from control or  $Prdm16$  mutant enteroids treated with sodium chloride (No Acetate, 5 mM) or sodium acetate (5 mM).

**G-I)** Lineage tracing of stem cell progeny in  $Prdm16^{\text{loxP/+}}$  (control) or  $Prdm16^{\text{loxP/loxP}}$  (mutant) tdTomato reporter mice. Animals received drinking water containing either 150 mM NaAc (Ac) or NaCl (No Acetate) 2d before tmx treatment. **G)** Cl. Caspase staining in lineage traced mice (quantification shown in Fig. 6). (Cl. Caspase-3, green; E-Cad, red; DNA, DAPI, Blue). **H)** Lysozyme area was measured in tdTomato positive and tdTomato negative crypts at 4d post tmx treatment. Lysozyme area per crypt in tdTomato positive crypts was normalized to lysozyme area per crypt in tdTomato negative crypts as an internal control for quantification. tdTomato (red), Lysozyme (green) DNA (DAPI, blue). Quantification is shown in graph.

**I)** Mucin2 positive cells were quantified in tdTomato positive areas of the intestinal epithelium (crypt and villus) at 4d post tmx treatment. Muc2-positive cells per tdTomato positive area are quantified in graph. tdTomato (red), MUC2 (green) DNA (DAPI, blue).

All panels show Mean  $\pm$  SEM. \*p-value<0.05, \*\*p-value<0.01, \*\*\*p-value<0.001, Scale bars: 100  $\mu\text{m}$  (A,E-F) 50  $\mu\text{m}$  (G-I).

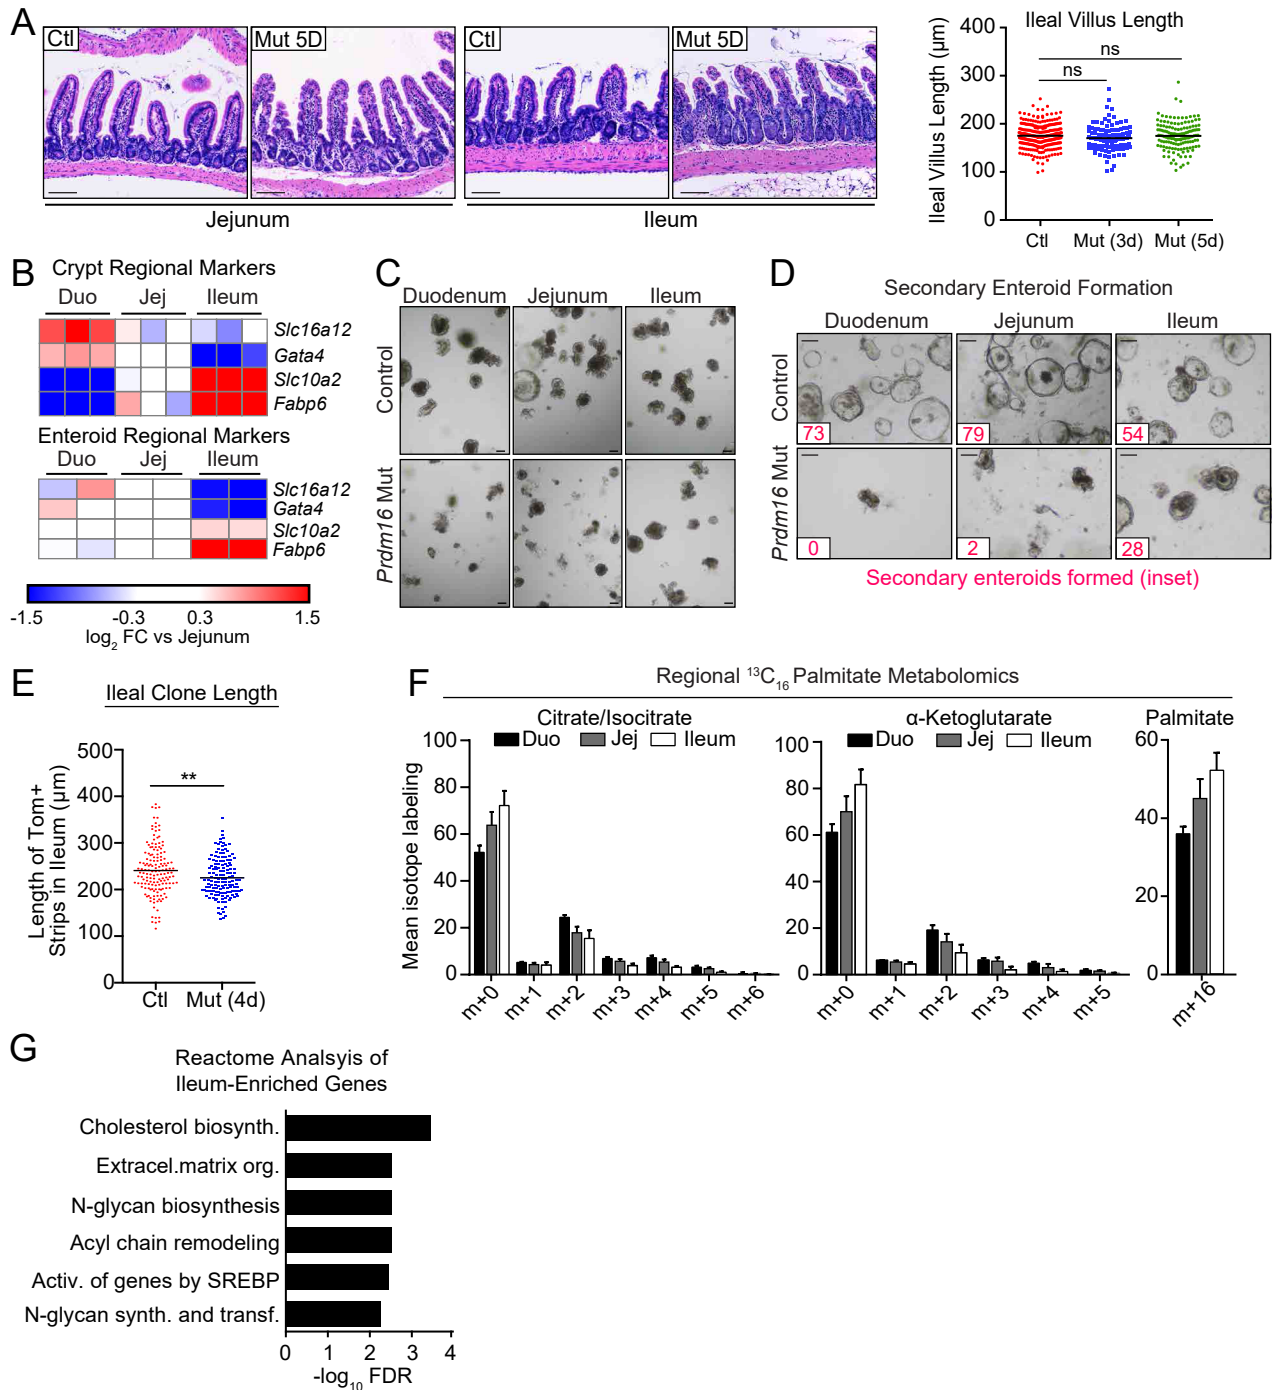

**Fig. S7: Regional control of PRDM16 expression and FAO in the small intestine (Related to Fig. 7).**

**A**) H&E histology of control (*Prdm16*<sup>loxP/loxP</sup>) and *Prdm16* mutant (*R26R*<sup>CreERT2</sup>; *Prdm16*<sup>loxP/loxP</sup>) jejunum and ileum at 5d post tamoxifen (tmx) injection (left). Quantification of ileal villus length at 3d and 5d post-tmx (right). **B**) Expression heat map of regional markers in: crypts from duodenum, jejunum, and ileum; and region-specific derived enteroids. Log<sub>2</sub> fold change shown relative to mean jejunal expression. n=3 mice. **C**) Wide-field view of duodenal, jejunal, and ileal enteroids from control and *Prdm16* mutant animals at 5d after *ex vivo* 4-OHT treatment. **D**) Secondary passaging of duodenal, jejunal, and ileal enteroids from control and *Prdm16* mutant animals at 8d after *ex vivo* 4-OHT treatment. Number (inset) is the number of enteroids recovered per well after passaging. **E**) Length of lineage-traced (tdTomato+) epithelial cell strips in the ileum from control (*Lgr5*<sup>GFP/Cre-ERT2</sup>; *R26R*<sup>lox-stop-lox-tdTomato</sup>; *Prdm16*<sup>loxP/+</sup>) and mutant (*Lgr5*<sup>GFP/Cre-ERT2</sup>; *R26R*<sup>lox-stop-lox-tdTomato</sup>; *Prdm16*<sup>loxP/loxP</sup>) animals at 4d post-tmx. n=146-150, 4 mice per group. **F**) Fractional isotope labeling of citrate/isocitrate,  $\alpha$ -ketoglutarate, and palmitate from duodenal, jejunal and ileal crypts incubated for 90 minutes in uniformly labeled  $^{13}\text{C}_{16}$ -palmitate. n=3 mice. **G**) Reactome enrichment analysis of genes with higher expression in ileal versus duodenal crypts. Mean  $\pm$  SEM. \*p-value<0.05, \*\*p-value<0.01, \*\*\*p-value<0.001. Scale bars: 100  $\mu\text{m}$  (A,C,D).

**Table S3. Oligonucleotide sequences, Related to STAR Methods**

| <b>Gene</b>      | <b>Forward Primer</b>        | <b>Reverse Primer</b>    |
|------------------|------------------------------|--------------------------|
| <i>Prdm16</i>    | CAGCACGGTGAAGCCATTC          | GCGTGCATCCGCTTGTG        |
| <i>Cd36</i>      | AAAGTTGCCATAATTGAGTCCT       | TCCGAACACAGCGTAGATAGA    |
| <i>Slc27a2</i>   | TCCTCCAAGATGTGCGGTA          | TAGGTGAGCGTCTCGTCTCG     |
| <i>Acs1</i>      | TGCCAGAGCTGATTGACATTC        | GGCATAACCAGAAGGTGGTGAG   |
| <i>Cpt1a</i>     | CTCCGCCTGAGCCATGAAG          | CACCAGTGATGATGCCATTCT    |
| <i>Cpt2</i>      | GCTCCGAGGCATTTGTC            | CATCGCTGCTTCTTTGGT       |
| <i>Acadm</i>     | AGGGTTTAGTTTTGAGTTGACGG      | CCCCGCTTTTGTGCATATTCCG   |
| <i>Acaa2</i>     | CCTCAGTTCTTGTCTGTTCAG        | AGGTGTGCGGTGATTCTG       |
| <i>Hadh</i>      | AGGCTACACGAGCGAGGCCGA        | ACGGACCCATGGGATACCCAGC   |
| <i>Eci1/Dci</i>  | GCAGGGGTTGCAGTGATGAA         | GATGACACCTCGGATGCTCTT    |
| <i>Eci2/Peci</i> | TGCTCCTCTTACACGTTTCCG        | CGTTGACTGCGTAGAGCTTTTC   |
| <i>Decr1</i>     | ACCGTGGTCTTCCACTTGTC         | TGCCCTTTTTGTTTTTTCAC     |
| <i>Pparg</i>     | TGTGAGACCAACAGCCTGAC         | GCATGGTGCCTTCGCTGA       |
| <i>Ppara</i>     | GCGTACGGCAATGGCTTTAT         | GAACGGCTTCCTCAGTTCTT     |
| <i>Gata4</i>     | TGGAAGACACCCCAATCTCG         | AGGTAGTGCCCGTCCCATC      |
| <i>Slc16a12</i>  | TGCTTCCTTGTTACCATCTGC        | CATGCTGTTTGGGAGTAATCCT   |
| <i>Fabp6</i>     | CTTCCAGGAGACGTGATTGAAA       | CCTCCGAAGTCTGGTGATAGTTG  |
| <i>Ppard</i>     | TCCATCGTCAACAAAGACGGG        | ACTTGGGCTCAATGATGTCAC    |
| <i>Ppargc1a</i>  | CCCTGCCATTGTTAAGACC          | TGCTGCTGTTCTGTTTTTC      |
| <i>Acaca</i>     | ATGGGCGGAATGGTCTCTTTC        | TGGGGACCTTGTCTTCATCAT    |
| <i>Fasn</i>      | CCCGAGTCAGAGAACCTACA         | GATCCTTCAGCTTTCAGACC     |
| <i>Scd1</i>      | GAGGCGAGCAACTGACTATC         | TCACCTTCTCTCGTTCATTTCC   |
| <i>Slc10a2</i>   | GTCTGTCCCCAAATGCAACT         | CACCCCATAGAAAACATCACCA   |
| <i>Olfm4</i>     | TGAAGGAGATGCAAAACTGG         | CTCCAGCTTCTCTACCAAGAGG   |
| <i>Lgr5</i>      | TAAAGACGACGGCAACAGTG         | GCCTTCAGGTCTTCTCAAA      |
| <i>Ascl2</i>     | CCTCTCTCGGACCCTCTCTCAG       | CAGTCAAGGTGTGCTTCCATGC   |
| <i>Sis</i>       | CGTTTCCGGTTC AAGCTCACA       | CCTGATGACTTTGATGCTGAACG  |
| <i>Chga</i>      | CAGCTCGTCCACTCTTCCG          | CCTCTCGTCTCCTTGGAGGG     |
| <i>Reg4</i>      | CTGAGCTGGAGTGTCAGTCAT        | GTCCACTGCCATAATTGCTTCT   |
| <i>Dclk1</i>     | GGGTGAGAACCATCTACCCATC       | CCAGCTTCTTAAAGGGCTCGAT   |
| <i>Kl67</i>      | CCTTTGCTGTCCCCGAAGA          | GGCTTCTCATCTGTTGCTTCT    |
| <i>Ifi44</i>     | ATACTATTAGATGAGAAAGCTGTGATTG | TACTATGTAACACAGCAATGCCT  |
| <i>Oas3</i>      | CTCTGGGGTCGCTAAACATCA        | CTGAGTGACAGGTCTTCTGGT    |
| <i>Ccng1</i>     | ACA ACTGACTCTCAGAACTGC       | CATTATCATGGGCCGACTCAAT   |
| <i>Bax</i>       | TGAAGACAGGGGCCTTTTTG         | AATTCGCCGGAGACTCG        |
| <i>Mdm2</i>      | TGTCTGTGTCTACCGAGGGTG        | TCCAACGGACTTAAACAATTCA   |
| <i>P21</i>       | CCTGGTGATGTCCGACCTG          | CCATGAGCGCATCGCAATC      |
| <i>Tff3</i>      | TTGCTGGGTCTCTGGGATAG         | TACTGCTCCGATGTGACAG      |
| <i>Mmp7</i>      | AGGAAGCTGGAGATGTGAGC         | TCTGCATTTCTTGAGGTTG      |
| <i>Defa4</i>     | CCAGGCTGATCCTATCCAAA         | ATTCCACAAGTCCCACGAAC     |
| <i>Defa-rs1</i>  | GCACAGAAGGCTCTGCTCTT         | ACCCAGATTCCACATTCAGC     |
| <i>Lyz1</i>      | GGAATGGATGGCTACCGTGG         | CATGCCACCCATGCTCGAAT     |
| <i>Lct</i>       | CTGT CATGGGCACA ACTTCTC      | TGTGGCATAATCAGCAAAGAGG   |
| <i>Cbr1</i>      | TCAATGACGACACCCCTTC          | CCTCTGTGATGGTCTCGCTTC    |
| <i>Spink4</i>    | TGCAGTCACATAGCTCACAAG        | CCATGCCAAGGAGGGGAA       |
| <i>Agr2</i>      | TGTCCCCAGAATTGTGTTTGTAGA     | TGTCAGAAGGTTTATAAGCGTAGA |
| <i>Ctca1</i>     | ACCAAAAGATCACC GCAAACC       | CTCTCCA ACTGTCATGTCCGA   |
| <i>Gcg</i>       | CTTCCCAGAAGAAGTCGCCA         | GTGACTGGCACGAGATGTTG     |



|                                    |                           |                         |
|------------------------------------|---------------------------|-------------------------|
| <i>Gip</i>                         | AACTGTTGGCTAGGGGACAC      | TGATGAAAGTCCCCTCTGCG    |
| <i>Hck</i>                         | TCCTCCGAGATGGAAGCG        | ACAGTGCGACCACAATGGTAT   |
| <i>Ngn3</i>                        | TCTCAAGCATCTCGCCTCTTC     | ACAGCAAGGGTACCGATGAGA   |
| <b>ChIP qPCR Primers</b>           |                           |                         |
|                                    | <b>Forward</b>            | <b>Reverse</b>          |
| <i>Decr1</i> -2kb<br>(Neg Control) | CATCCTTCTCTTTCCTCCACTC    | CAGCGATATTCCTATGGAAGTGA |
| <i>Hadh</i> +2.6 kb<br>(Neg Con)   | ACAGACTCTCCACTGACTTAGA    | CTCGAAGTAGCATCAGGGTTAC  |
| <i>Slc27a2</i> -0.2 kb             | TGCGGTGCGTTTATAAGGT       | CGTGGTGCTGTGGTTAGTTA    |
| <i>Acs11</i> -0.7 kb               | CGTCCTTGAGCAACGACTAA      | GGAATACAGGACTTCCGCAATA  |
| <i>Cpt1a</i> +2kb                  | CACGCGACTTTCCTGTACTT      | TCGGGCCTACCGGTAAATA     |
| <i>Cpt2</i> -0.2kb                 | TGTA ACTCTGAAGCTAACCTCTTT | GTCTGCCAAATGCCAAGTTT    |
| <i>Acaa2</i> -0.25kb               | AGTGGTTCTCAAATTCCCAGAG    | CTCGGGAAGACCAAGGTTAC    |
| <i>Hadh</i> +0.8kb                 | ACAGAAGCCGATCAGAGATTAG    | CTGAAATCTGCGTGCTTGTC    |
| <i>Eci2</i> -0.2kb                 | GGACAGCTCCCAGAATGTTTA     | CAGGAGCACTCTTGTCCATATAA |
| <i>Decr1</i> +0.7kb                | CCTTGTGGAGGATTCCTTCT      | GAGAGGGAAAGACACAGCTAAT  |
| <b>shRNA</b>                       |                           |                         |
|                                    | <b>Sequence</b>           |                         |
| <i>Prdm16</i><br>shRNA A           | GCATGGTATGAAAGAGGAAAT     |                         |
| <i>Prdm16</i><br>shRNA C           | GCTCCTGTCTACATTCCTGAA     |                         |
